# Supplementary material
Source: PubMed Central journal article supplement (PMC3756451)
Supplement: cn400051e_si_001.pdf [file cn400051e_si_001.pdf]

*Supporting Information*

**Tanshinones Inhibit Amyloid Aggregation by Amyloid- $\beta$  Peptide, Disaggregate Amyloid Fibrils, and Protect Cultured Cells**

Qiuming Wang<sup>1¶</sup>, Xiang Yu<sup>1¶</sup>, Kunal Patal<sup>2</sup>, Rundong Hu<sup>1</sup>, Steven Chuang<sup>1,3</sup>, Ge Zhang<sup>2\*</sup>,  
and Jie Zheng<sup>1\*</sup>

<sup>1</sup> Department of Chemical and Biomolecular Engineering  
The University of Akron, Akron, OH, 44325

<sup>2</sup> Department of Biomedical Engineering  
The University of Akron, OH, 44325

<sup>3</sup> College of Polymer Science and Polymer Engineering  
The University of Akron, Akron, OH, 44325

¶ These authors contributed equally to this work.

\* To whom correspondence should be addressed. Email: [gezhang@uakron.edu](mailto:gezhang@uakron.edu) and  
[zhengj@uakron.edu](mailto:zhengj@uakron.edu)

**Running Title:** Tanshinones inhibit the aggregation and cytotoxicity of A $\beta$

**Keywords:** A $\beta$ , amyloid, Tanshinone, Alzheimer disease

**Figure S1.** A complete set of force field parameters for (a) Tanshinone (TS1) and (b) Tanshinone IIA (TS2) in CHARMM27 format.

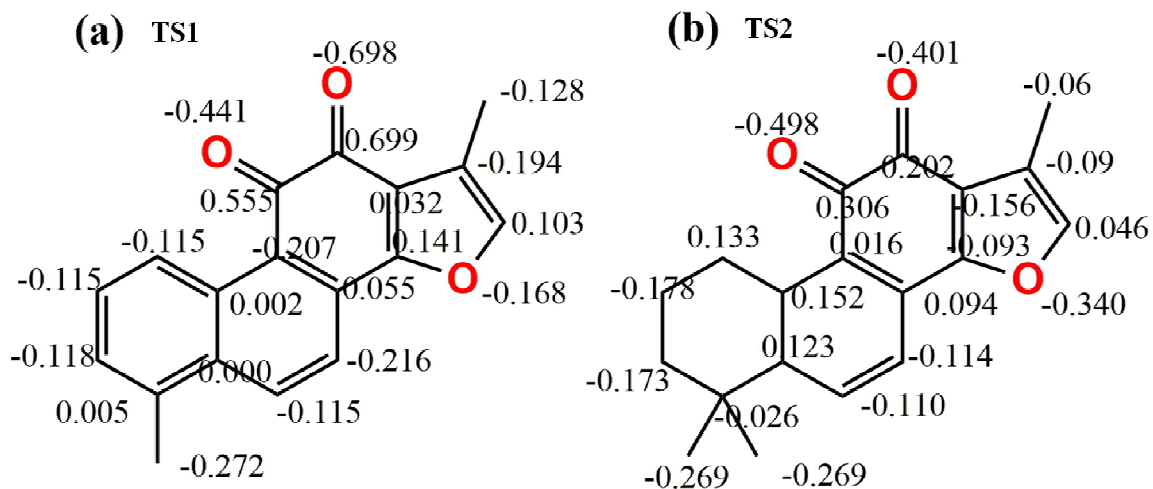

**\* Toppar stream file**

\*

36 1

|      |     |      |          |
|------|-----|------|----------|
| MASS | 302 | CZ61 | 12.01100 |
| MASS | 299 | CZ51 | 12.01100 |
| MASS | 296 | CZ25 | 12.01100 |
| MASS | 366 | OZ50 | 15.99940 |
| MASS | 361 | OZ23 | 15.99940 |
| MASS | 320 | CZ33 | 12.01100 |
| MASS | 302 | CK61 | 12.01100 |
| MASS | 316 | CK32 | 12.01100 |
| MASS | 311 | CK30 | 12.01100 |
| MASS | 296 | CK25 | 12.01100 |
| MASS | 299 | CK51 | 12.01100 |
| MASS | 366 | OK50 | 15.99940 |
| MASS | 320 | CK33 | 12.01100 |
| MASS | 361 | OK23 | 15.99940 |
| MASS | 257 | HGA2 | 1.00800  |
| MASS | 277 | HZ61 | 1.00800  |
| MASS | 275 | HZ52 | 1.00800  |
| MASS | 258 | HGA3 | 1.00800  |

**RESI TS1**                    **0.000**

GROUP

|         |      |        |
|---------|------|--------|
| ATOM C1 | CZ61 | -0.115 |
| ATOM C2 | CZ61 | -0.118 |

|          |      |        |
|----------|------|--------|
| ATOM C3  | CZ61 | 0.005  |
| ATOM C4  | CZ61 | 0.000  |
| ATOM C5  | CZ61 | 0.002  |
| ATOM C6  | CZ61 | -0.115 |
| ATOM C7  | CZ61 | -0.115 |
| ATOM C8  | CZ61 | -0.216 |
| ATOM C9  | CZ61 | 0.055  |
| ATOM C10 | CZ61 | -0.207 |
| ATOM C11 | CZ51 | 0.141  |
| ATOM C12 | CZ51 | 0.032  |
| ATOM C13 | CZ25 | 0.699  |
| ATOM C14 | CZ25 | 0.555  |
| ATOM O1  | OZ50 | -0.168 |
| ATOM C15 | CZ51 | 0.103  |
| ATOM C16 | CZ51 | -0.194 |
| ATOM O2  | OZ23 | -0.698 |
| ATOM O3  | OZ23 | -0.441 |
| ATOM C17 | CZ33 | -0.272 |
| ATOM C18 | CZ33 | -0.228 |
| ATOM H1  | HZ61 | 0.115  |
| ATOM H2  | HZ61 | 0.115  |
| ATOM H3  | HZ61 | 0.115  |
| ATOM H4  | HZ61 | 0.115  |
| ATOM H5  | HZ61 | 0.115  |
| ATOM H6  | HZ52 | 0.180  |
| ATOM H9  | HGA3 | 0.090  |
| ATOM H10 | HGA3 | 0.090  |
| ATOM H11 | HGA3 | 0.090  |
| ATOM H12 | HGA3 | 0.090  |
| ATOM H13 | HGA3 | 0.090  |
| ATOM H14 | HGA3 | 0.090  |

|          |     |
|----------|-----|
| BOND H13 | C18 |
| BOND H10 | C17 |
| BOND O2  | C13 |
| BOND H14 | C18 |
| BOND H1  | C1  |
| BOND H2  | C2  |
| BOND C18 | C16 |
| BOND C18 | H12 |
| BOND C2  | C1  |
| BOND C2  | C3  |
| BOND C1  | C6  |
| BOND H11 | C17 |
| BOND C17 | C3  |
| BOND C17 | H9  |
| BOND H6  | C15 |
| BOND C16 | C15 |
| BOND C16 | C12 |

BOND C6 H3  
 BOND C6 C5  
 BOND C13 C12  
 BOND C13 C14  
 BOND C3 C4  
 BOND C15 O1  
 BOND C4 C5  
 BOND C4 C7  
 BOND O1 C11  
 BOND C12 C11  
 BOND C11 C9  
 BOND C5 C10  
 BOND C10 C9  
 BOND C10 C14  
 BOND H4 C7  
 BOND C7 C8  
 BOND C8 C9  
 BOND C8 H5  
 BOND C14 O3

IMPR C13 C14 C12 O2  
 IMPR C14 C13 C10 O3

**RESI TS2 0.000**

GROUP

|          |      |        |
|----------|------|--------|
| ATOM C1  | CK61 | 0.152  |
| ATOM C2  | CK61 | 0.123  |
| ATOM C3  | CK61 | -0.110 |
| ATOM C4  | CK61 | -0.114 |
| ATOM C5  | CK61 | 0.094  |
| ATOM C6  | CK61 | 0.016  |
| ATOM C7  | CK32 | 0.133  |
| ATOM C8  | CK32 | -0.178 |
| ATOM C9  | CK32 | -0.173 |
| ATOM C10 | CK30 | -0.026 |
| ATOM C11 | CK25 | 0.306  |
| ATOM C12 | CK25 | 0.202  |
| ATOM C13 | CK51 | -0.156 |
| ATOM C14 | CK51 | -0.093 |
| ATOM C15 | CK51 | 0.046  |
| ATOM C16 | CK51 | -0.090 |
| ATOM O1  | OK50 | -0.340 |
| ATOM C17 | CK33 | -0.060 |
| ATOM C18 | CK33 | -0.269 |
| ATOM C19 | CK33 | -0.269 |
| ATOM O2  | OK23 | -0.498 |
| ATOM O3  | OK23 | -0.401 |
| ATOM H1  | HZ61 | 0.115  |
| ATOM H2  | HZ61 | 0.115  |
| ATOM H3  | HGA2 | 0.090  |

|      |     |      |       |
|------|-----|------|-------|
| ATOM | H4  | HGA2 | 0.090 |
| ATOM | H5  | HGA2 | 0.090 |
| ATOM | H6  | HGA2 | 0.090 |
| ATOM | H7  | HGA2 | 0.090 |
| ATOM | H8  | HGA2 | 0.090 |
| ATOM | H9  | HZ52 | 0.125 |
| ATOM | H10 | HGA3 | 0.090 |
| ATOM | H11 | HGA3 | 0.090 |
| ATOM | H12 | HGA3 | 0.090 |
| ATOM | H13 | HGA3 | 0.090 |
| ATOM | H14 | HGA3 | 0.090 |
| ATOM | H15 | HGA3 | 0.090 |
| ATOM | H16 | HGA3 | 0.090 |
| ATOM | H17 | HGA3 | 0.090 |
| ATOM | H18 | HGA3 | 0.090 |

|      |     |     |
|------|-----|-----|
| BOND | H14 | C18 |
| BOND | H7  | C9  |
| BOND | H15 | C18 |
| BOND | C18 | H13 |
| BOND | C18 | C10 |
| BOND | H3  | C7  |
| BOND | H11 | C17 |
| BOND | O2  | C11 |
| BOND | C9  | C10 |
| BOND | C9  | H8  |
| BOND | C9  | C8  |
| BOND | C11 | C6  |
| BOND | C11 | C12 |
| BOND | C5  | C6  |
| BOND | C5  | C4  |
| BOND | C5  | C14 |
| BOND | C6  | C1  |
| BOND | C3  | C4  |
| BOND | C3  | C2  |
| BOND | C3  | H1  |
| BOND | C4  | H2  |
| BOND | C2  | C1  |
| BOND | C2  | C10 |
| BOND | C1  | C7  |
| BOND | C10 | C19 |
| BOND | C13 | C14 |
| BOND | C13 | C12 |
| BOND | C13 | C16 |
| BOND | C14 | O1  |
| BOND | O1  | C15 |
| BOND | C12 | O3  |
| BOND | C7  | C8  |
| BOND | C7  | H4  |
| BOND | C15 | C16 |

BOND C15 H9  
 BOND C16 C17  
 BOND C17 H12  
 BOND C17 H10  
 BOND H5 C8  
 BOND C8 H6  
 BOND C19 H17  
 BOND C19 H16  
 BOND C19 H18

IMPR C11 C12 C6 O2  
 IMPR C12 C11 C13 O3

END

**BONDS**

|      |      |        |        |
|------|------|--------|--------|
| CZ25 | CZ25 | 300.00 | 1.4800 |
| CZ25 | CZ51 | 254.00 | 1.4600 |
| CZ51 | CZ61 | 400.00 | 1.4360 |
| CZ33 | HGA3 | 322.00 | 1.1110 |
| CZ51 | CZ33 | 229.63 | 1.5000 |
| CZ51 | CZ51 | 410.00 | 1.3600 |
| CZ51 | HZ52 | 375.00 | 1.0830 |
| CZ51 | OZ50 | 450.00 | 1.3610 |
| CZ25 | CZ61 | 254.00 | 1.5000 |
| CZ61 | CZ61 | 305.00 | 1.3750 |
| CZ61 | CZ33 | 230.00 | 1.4900 |
| CZ61 | HZ61 | 340.00 | 1.0800 |
| CZ25 | OZ23 | 700.00 | 1.2300 |
| CK25 | CK25 | 300.00 | 1.4800 |
| CK25 | CK51 | 254.00 | 1.4600 |
| CK51 | CK61 | 300.00 | 1.4360 |
| CK61 | CK30 | 230.00 | 1.4900 |
| CK33 | HGA3 | 322.00 | 1.1110 |
| CK51 | CK33 | 229.63 | 1.5000 |
| CK51 | CK51 | 410.00 | 1.3600 |
| CK51 | HZ52 | 375.00 | 1.0830 |
| CK51 | OK50 | 450.00 | 1.3710 |
| CK25 | CK61 | 254.00 | 1.4600 |
| CK61 | CK61 | 305.00 | 1.3750 |
| CK61 | CK33 | 230.00 | 1.4900 |
| CK61 | HZ61 | 340.00 | 1.0800 |
| CK25 | OK23 | 700.00 | 1.2300 |
| CK30 | CK33 | 222.50 | 1.5380 |
| CK32 | HGA2 | 309.00 | 1.1110 |
| CK32 | CK32 | 222.50 | 1.5300 |
| CK51 | CK32 | 229.63 | 1.5000 |
| CK61 | CK32 | 230.00 | 1.4900 |
| CK30 | CK32 | 222.50 | 1.5380 |

**ANGLES**

|      |      |      |        |        |       |         |
|------|------|------|--------|--------|-------|---------|
| CZ25 | CZ25 | CZ51 | 40.00  | 117.20 |       |         |
| CZ25 | CZ25 | CZ61 | 40.00  | 117.20 |       |         |
| CZ25 | CZ25 | OZ23 | 95.00  | 121.50 |       |         |
| CZ51 | CZ25 | OZ23 | 70.00  | 121.30 |       |         |
| CZ25 | CZ51 | CZ51 | 45.80  | 130.00 |       |         |
| CZ51 | CZ51 | CZ61 | 45.80  | 130.00 |       |         |
| CZ61 | CZ51 | OZ50 | 65.00  | 127.80 |       |         |
| CZ51 | CZ61 | CZ61 | 36.00  | 120.00 |       |         |
| CZ61 | CZ61 | CZ61 | 40.00  | 120.00 | 35.00 | 2.41620 |
| CZ61 | CZ61 | HZ61 | 30.00  | 120.00 | 22.00 | 2.15250 |
| CZ61 | CZ61 | CZ33 | 45.80  | 120.00 |       |         |
| CZ25 | CZ61 | CZ61 | 45.00  | 120.00 |       |         |
| CZ51 | CZ51 | OZ50 | 130.00 | 111.70 |       |         |
| CZ51 | OZ50 | CZ51 | 100.00 | 106.00 |       |         |
| CZ51 | CZ51 | CZ51 | 90.00  | 107.20 |       |         |
| CZ61 | CZ25 | OZ23 | 70.00  | 124.30 |       |         |
| CZ51 | CZ51 | HZ52 | 22.00  | 130.00 | 15.00 | 2.21500 |
| CZ51 | CZ51 | CZ33 | 45.80  | 130.00 |       |         |
| OZ50 | CZ51 | HZ52 | 50.00  | 118.30 |       |         |
| CZ61 | CZ33 | HGA3 | 49.30  | 107.50 |       |         |
| CZ51 | CZ33 | HGA3 | 55.00  | 109.50 |       |         |
| CK25 | CK25 | CK51 | 40.00  | 117.20 |       |         |
| CK25 | CK25 | CK61 | 40.00  | 117.20 |       |         |
| CK25 | CK25 | OK23 | 95.00  | 121.50 |       |         |
| CK51 | CK25 | OK23 | 70.00  | 121.30 |       |         |
| CK51 | CK51 | CK61 | 45.80  | 130.00 |       |         |
| CK61 | CK51 | OK50 | 65.00  | 127.80 |       |         |
| CK51 | CK61 | CK61 | 36.00  | 120.00 |       |         |
| CK61 | CK61 | CK30 | 45.80  | 120.00 |       |         |
| CK61 | CK30 | CK32 | 51.80  | 107.50 |       |         |
| CK61 | CK30 | CK33 | 51.80  | 107.50 |       |         |
| CK61 | CK61 | CK61 | 40.00  | 120.00 | 35.00 | 2.41620 |
| CK61 | CK61 | HZ61 | 30.00  | 120.00 | 22.00 | 2.15250 |
| CK61 | CK61 | CK33 | 45.80  | 120.00 |       |         |
| CK25 | CK61 | CK61 | 45.00  | 120.00 |       |         |
| CK51 | CK51 | OK50 | 130.00 | 111.70 |       |         |
| CK51 | OK50 | CK51 | 100.00 | 106.00 |       |         |
| CK30 | CK33 | HGA3 | 33.43  | 110.10 | 22.53 | 2.17900 |
| CK30 | CK32 | HGA2 | 26.50  | 110.10 | 22.53 | 2.179   |
| CK30 | CK32 | CK32 | 58.35  | 113.50 | 11.16 | 2.561   |
| CK32 | CK32 | HGA2 | 26.50  | 110.10 | 22.53 | 2.17900 |
| CK61 | CK61 | CK32 | 45.80  | 120.00 |       |         |
| CK61 | CK32 | CK32 | 51.80  | 107.50 |       |         |
| CK61 | CK32 | HGA2 | 49.30  | 107.50 |       |         |
| HGA2 | CK32 | HGA2 | 35.50  | 109.00 | 5.40  | 1.802   |
| CK32 | CK30 | CK33 | 58.35  | 113.50 | 11.16 | 2.561   |
| CK61 | CK25 | OK23 | 70.00  | 121.30 |       |         |
| CK51 | CK51 | CK51 | 90.00  | 107.20 |       |         |
| CK51 | CK51 | HZ52 | 22.00  | 130.00 | 15.00 | 2.21500 |

|      |      |      |       |        |       |         |
|------|------|------|-------|--------|-------|---------|
| OK50 | CK51 | HZ52 | 50.00 | 118.30 |       |         |
| CK51 | CK51 | CK33 | 45.80 | 130.00 |       |         |
| CK51 | CK33 | HGA3 | 55.00 | 109.50 |       |         |
| HGA3 | CK33 | HGA3 | 35.50 | 108.40 | 5.40  | 1.80200 |
| CK33 | CK30 | CK33 | 58.35 | 113.50 | 11.16 | 2.561   |

### DIHEDRALS

|      |      |      |      |         |   |        |
|------|------|------|------|---------|---|--------|
| CZ51 | CZ25 | CZ25 | CZ61 | 8.4000  | 2 | 180.00 |
| CZ51 | CZ25 | CZ25 | OZ23 | 6.4000  | 2 | 0.00   |
| CZ61 | CZ25 | CZ25 | OZ23 | 3.4000  | 2 | 0.00   |
| OZ23 | CZ25 | CZ25 | OZ23 | 2.3000  | 2 | 180.00 |
| CZ25 | CZ25 | CZ51 | CZ51 | 5.5850  | 2 | 180.00 |
| OZ23 | CZ25 | CZ51 | CZ51 | 3.5850  | 2 | 180.00 |
| CZ25 | CZ25 | CZ61 | CZ61 | 2.5850  | 2 | 180.00 |
| CZ25 | CZ51 | CZ51 | CZ51 | 2.0000  | 2 | 180.00 |
| CZ25 | CZ51 | CZ51 | CZ61 | 3.0000  | 2 | 180.00 |
| CZ25 | CZ51 | CZ51 | CZ33 | 4.9000  | 2 | 180.00 |
| CZ25 | CZ51 | CZ51 | OZ50 | 8.5000  | 2 | 180.00 |
| CZ51 | CZ51 | CZ51 | CZ61 | 5.0000  | 2 | 180.00 |
| CZ51 | CZ51 | CZ51 | CZ33 | 4.0000  | 2 | 180.00 |
| CZ33 | CZ51 | CZ51 | OZ50 | 3.0000  | 2 | 180.00 |
| CZ51 | CZ51 | CZ61 | CZ61 | 3.0000  | 2 | 180.00 |
| OZ50 | CZ51 | CZ61 | CZ61 | 3.0000  | 2 | 180.00 |
| CZ61 | CZ51 | OZ50 | CZ51 | 10.5000 | 2 | 180.00 |
| CZ25 | CZ61 | CZ61 | CZ51 | 3.1000  | 2 | 180.00 |
| CZ51 | CZ61 | CZ61 | CZ61 | 5.1000  | 2 | 180.00 |
| CZ51 | CZ61 | CZ61 | HZ61 | 5.4000  | 2 | 180.00 |
| CZ61 | CZ61 | CZ61 | CZ61 | 3.1000  | 2 | 180.00 |
| CZ61 | CZ61 | CZ61 | HZ61 | 4.2000  | 2 | 180.00 |
| CZ61 | CZ61 | CZ33 | HGA3 | 0.0020  | 6 | 0.00   |
| CZ61 | CZ61 | CZ61 | CZ33 | 3.1000  | 2 | 180.00 |
| CZ25 | CZ61 | CZ61 | CZ61 | 3.1000  | 2 | 180.00 |
| OZ23 | CZ25 | CZ61 | CZ61 | 2.5850  | 2 | 180.00 |
| CZ51 | CZ51 | CZ51 | CZ51 | 15.0000 | 2 | 0.00   |
| CZ51 | CZ51 | CZ51 | OZ50 | 8.5000  | 2 | 180.00 |
| CZ51 | CZ51 | CZ51 | HZ52 | 1.5000  | 2 | 180.00 |
| CZ51 | CZ51 | OZ50 | CZ51 | 12.5000 | 2 | 180.00 |
| CZ51 | CZ51 | CZ33 | HGA3 | 0.0000  | 3 | 0.00   |
| HZ52 | CZ51 | OZ50 | CZ51 | 3.8000  | 2 | 180.00 |
| CZ33 | CZ51 | CZ51 | HZ52 | 1.0000  | 2 | 180.00 |
| CZ33 | CZ61 | CZ61 | HZ61 | 2.4000  | 2 | 180.00 |
| HZ61 | CZ61 | CZ61 | HZ61 | 2.4000  | 2 | 180.00 |
| CK51 | CK25 | CK25 | CK61 | 8.4000  | 2 | 180.00 |
| CK51 | CK25 | CK25 | OK23 | 6.4000  | 2 | 0.00   |
| CK61 | CK25 | CK25 | OK23 | 3.4000  | 2 | 0.00   |
| OK23 | CK25 | CK25 | OK23 | 2.3000  | 2 | 180.00 |
| CK25 | CK25 | CK51 | CK51 | 5.5850  | 2 | 180.00 |
| OK23 | CK25 | CK51 | CK51 | 3.5850  | 2 | 180.00 |
| CK25 | CK25 | CK61 | CK61 | 2.5850  | 2 | 180.00 |
| CK25 | CK51 | CK51 | CK51 | 2.0000  | 2 | 180.00 |



|      |      |      |      |         |   |        |
|------|------|------|------|---------|---|--------|
| CK25 | CK51 | CK51 | CK61 | 2.0000  | 2 | 180.00 |
| CK25 | CK51 | CK51 | CK33 | 4.9000  | 2 | 180.00 |
| CK25 | CK51 | CK51 | OK50 | 8.5000  | 2 | 180.00 |
| CK51 | CK51 | CK51 | CK61 | 2.0000  | 2 | 180.00 |
| CK51 | CK51 | CK51 | CK33 | 4.0000  | 2 | 180.00 |
| CK33 | CK51 | CK51 | OK50 | 3.0000  | 2 | 180.00 |
| CK51 | CK51 | CK61 | CK61 | 1.0000  | 2 | 180.00 |
| OK50 | CK51 | CK61 | CK61 | 1.0000  | 2 | 180.00 |
| CK61 | CK51 | OK50 | CK51 | 10.5000 | 2 | 180.00 |
| CK25 | CK61 | CK61 | CK51 | 3.1000  | 2 | 180.00 |
| CK25 | CK61 | CK61 | CK32 | 2.4000  | 2 | 180.00 |
| CK51 | CK61 | CK61 | CK61 | 3.1000  | 2 | 180.00 |
| CK51 | CK61 | CK61 | HZ61 | 2.4000  | 2 | 180.00 |
| CK61 | CK61 | CK61 | CK30 | 3.1000  | 2 | 180.00 |
| CK30 | CK61 | CK61 | CK32 | 2.4000  | 2 | 180.00 |
| CK30 | CK61 | CK61 | HZ61 | 2.4000  | 2 | 180.00 |
| CK61 | CK61 | CK30 | CK32 | 0.2300  | 2 | 180.00 |
| CK61 | CK61 | CK30 | CK33 | 0.2300  | 2 | 180.00 |
| CK61 | CK30 | CK32 | CK32 | 0.0400  | 3 | 0.00   |
| CK61 | CK30 | CK32 | HGA2 | 0.0000  | 3 | 0.00   |
| CK61 | CK30 | CK33 | HGA3 | 0.0400  | 3 | 0.00   |
| CK61 | CK61 | CK61 | CK61 | 3.1000  | 2 | 180.00 |
| CK61 | CK61 | CK61 | HZ61 | 4.2000  | 2 | 180.00 |
| CK61 | CK61 | CK33 | HGA3 | 0.0020  | 6 | 0.00   |
| CK61 | CK61 | CK61 | CK33 | 3.1000  | 2 | 180.00 |
| CK25 | CK61 | CK61 | CK61 | 3.1000  | 2 | 180.00 |
| OK23 | CK25 | CK61 | CK61 | 2.5850  | 2 | 180.00 |
| CK51 | CK51 | CK51 | CK51 | 15.0000 | 2 | 180.00 |
| CK51 | CK51 | CK51 | OK50 | 8.5000  | 2 | 180.00 |
| CK51 | CK51 | CK51 | HZ52 | 1.5000  | 2 | 180.00 |
| CK51 | CK51 | OK50 | CK51 | 12.5000 | 2 | 180.00 |
| CK51 | CK51 | CK33 | HGA3 | 0.0000  | 3 | 0.00   |
| HZ52 | CK51 | OK50 | CK51 | 3.8000  | 2 | 180.00 |
| CK33 | CK51 | CK51 | HZ52 | 1.0000  | 2 | 180.00 |
| CK33 | CK61 | CK61 | HZ61 | 2.4000  | 2 | 180.00 |
| HZ61 | CK61 | CK61 | HZ61 | 2.4000  | 2 | 180.00 |
| CK61 | CK32 | CK32 | CK32 | 0.0400  | 3 | 0.00   |
| CK61 | CK32 | CK32 | HGA2 | 0.0400  | 3 | 0.00   |
| CK61 | CK61 | CK32 | CK32 | 0.2300  | 2 | 180.00 |
| CK61 | CK61 | CK32 | HGA2 | 0.0020  | 6 | 0.00   |
| CK61 | CK61 | CK61 | CK32 | 3.1000  | 2 | 180.00 |
| CK30 | CK32 | CK32 | CK32 | 0.1950  | 3 | 0.00   |
| CK32 | CK32 | CK32 | HGA2 | 0.1950  | 3 | 0.00   |
| CK33 | CK30 | CK32 | CK32 | 0.2000  | 3 | 0.00   |
| CK32 | CK30 | CK33 | HGA3 | 0.1600  | 3 | 0.00   |
| CK30 | CK32 | CK32 | HGA2 | 0.1950  | 3 | 0.00   |
| CK33 | CK30 | CK32 | HGA2 | 0.1950  | 3 | 0.00   |
| CK33 | CK30 | CK33 | HGA3 | 0.1600  | 3 | 0.00   |
| HGA2 | CK32 | CK32 | HGA2 | 0.2200  | 3 | 0.00   |

**IMPROPERS**

|      |      |      |      |        |   |      |
|------|------|------|------|--------|---|------|
| CZ25 | CZ25 | CZ61 | OZ23 | 6.0000 | 0 | 0.00 |
| CZ25 | CZ25 | CZ51 | OZ23 | 6.0000 | 0 | 0.00 |
| CK25 | CK25 | CK51 | OK23 | 6.0000 | 0 | 0.00 |
| CK25 | CK25 | CK61 | OK23 | 6.0000 | 0 | 0.00 |

NONBONDED nbxmod 5 atom cdiel fshift vatom vdistance vswitch -  
cutnb 14.0 ctofnb 12.0 ctonnb 10.0 eps 1.0 e14fac 1.0 wmin 1.5

|      |     |         |        |     |       |      |
|------|-----|---------|--------|-----|-------|------|
| CZ61 | 0.0 | -0.0700 | 1.9924 |     |       |      |
| CZ51 | 0.0 | -0.0500 | 2.1000 |     |       |      |
| CZ25 | 0.0 | -0.0900 | 2.0000 |     |       |      |
| OZ23 | 0.0 | -0.0500 | 1.7000 | 0.0 | -0.12 | 1.40 |
| OZ50 | 0.0 | -0.1200 | 1.7000 |     |       |      |
| HZ61 | 0.0 | -0.0300 | 1.3582 |     |       |      |
| HGA3 | 0.0 | -0.0240 | 1.3400 |     |       |      |
| CZ33 | 0.0 | -0.0780 | 2.0500 | 0.0 | -0.01 | 1.9  |
| HZ52 | 0.0 | -0.0460 | 0.9000 |     |       |      |
| CK61 | 0.0 | -0.0700 | 1.9924 |     |       |      |
| CK51 | 0.0 | -0.0500 | 2.1000 |     |       |      |
| CK25 | 0.0 | -0.0900 | 2.0000 |     |       |      |
| OK23 | 0.0 | -0.0500 | 1.7000 | 0.0 | -0.12 | 1.40 |
| OK50 | 0.0 | -0.1200 | 1.7000 |     |       |      |
| CK33 | 0.0 | -0.0780 | 2.0500 | 0.0 | -0.01 | 1.9  |
| CK30 | 0.0 | -0.0320 | 2.0000 | 0.0 | -0.01 | 1.9  |
| HGA2 | 0.0 | -0.0350 | 1.3400 |     |       |      |
| CK32 | 0.0 | -0.0560 | 2.0100 | 0.0 | -0.01 | 1.9  |

HBOND CUTHB 0.5

END
